## RESEARCH ARTICLE

## Comparative analysis of financial toxicity between SARS-CoV-2 infection and common comorbidities

Han Su<sup>1\*</sup>, Hilaire J. Thompson<sup>2</sup>, Karl Cristie Figuracion<sup>3</sup>, Mayur Bipin Patel<sup>4,5</sup>, Dale M. Needham<sup>6,7,8,9</sup>

**1** School of Nursing, Vanderbilt University, Nashville, TN, United States of America, **2** School of Nursing, University of Washington, Seattle, WA, United States of America, **3** Department of Radiation Oncology, School of Medicine, University of Washington, Seattle, WA, United States of America, **4** Division of Trauma, Emergency General Surgery and Surgical Critical Care, Vanderbilt University Medical Center, Nashville, TN, United States of America, **5** Critical Illness, Brain Dysfunction and Survivorship Center, Vanderbilt University Medical, Nashville, TN, United States of America, **6** Department of Medicine, Division of Pulmonary and Critical Care Medicine, Johns Hopkins University School of Medicine, Baltimore, MD, United States of America, **7** Department of Physical Medicine and Rehabilitation, Johns Hopkins University School of Medicine, Baltimore, MD, United States of America, **8** Outcomes After Critical Illness and Surgery (OACIS) Group, Johns Hopkins University, Baltimore, MD, United States of America, **9** School of Nursing, Johns Hopkins University, Baltimore, MD, United States of America

\* [han.su@vanderbilt.edu](mailto:han.su@vanderbilt.edu)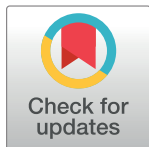

## OPEN ACCESS

**Citation:** Su H, Thompson HJ, Figuracion KC, Patel MB, Needham DM (2024) Comparative analysis of financial toxicity between SARS-CoV-2 infection and common comorbidities. PLoS ONE 19(8): e0309116. <https://doi.org/10.1371/journal.pone.0309116>

**Editor:** Dong Keon Yon, Kyung Hee University School of Medicine, REPUBLIC OF KOREA

**Received:** April 30, 2024

**Accepted:** August 3, 2024

**Published:** August 15, 2024

**Copyright:** © 2024 Su et al. This is an open access article distributed under the terms of the [Creative Commons Attribution License](https://creativecommons.org/licenses/by/4.0/), which permits unrestricted use, distribution, and reproduction in any medium, provided the original author and source are credited.

**Data Availability Statement:** Data are available from the <https://www.cdc.gov/nchs/nhis/data-questionnaires-documentation.htm>.

**Funding:** The author(s) received no specific funding for this work.

**Competing interests:** The authors have declared that no competing interests exist.

## Abstract

Financial toxicity is common in individuals with COVID-19 and Long COVID. However, the extent of financial toxicity experienced, in comparison to other common comorbidities, is uncertain. Contributing factors exacerbating financial challenges in Long COVID are also unclear. These knowledge gaps are addressed via a cross-sectional analysis utilizing data from the 2022 National Health Interview Survey (NHIS), a representative sample drawn from the United States. COVID-19 cases were identified through self-reported positive testing or physician diagnoses. Long COVID was defined as experiencing COVID-19-related symptoms for more than three months. Comorbidity was assessed based on self-reported diagnoses of ten doctor-diagnosed conditions (Yes/No). Financial toxicity was defined as having difficulty paying medical bills, cost-related medication nonadherence, delaying healthcare due to cost, and/or not obtained healthcare due to cost. A total of 27,492 NHIS 2022 respondents were included in our analysis, representing 253 million U.S. adults. In multivariable logistic regression models, adults with Long COVID (excluding respondents with COVID-19 but not Long COVID), showed increased financial toxicity compared to those with other comorbidities, such as epilepsy (OR [95% CI]: 1.69 [1.22, 2.33]), dementia (1.51 [1.01, 2.25]), cancer (1.43 [1.19, 1.71]) or respiratory/cardiovascular conditions (1.18 [1.00, 1.40]/1.23 [1.02, 1.47]). Long COVID-related financial toxicity was associated with female sex, age <65 years, lack of medical insurance, current paid employment, residence region, food insecurity, fatigue, mild to severe depression symptoms experienced during the survey completion, visits to hospital emergency rooms, presence of arthritis, cardiovascular or respiratory conditions, and social activity limitations. In conclusion, American adults with Long COVID, but not those who had prior COVID-19 infection without Long COVID,

exhibited a higher prevalence of financial toxicity compared to individuals with common comorbidities. Vulnerable populations were at greater risk for financial toxicity. These findings emphasize the importance of evaluating strategies to reduce economic burden and increase awareness of the effect of Long COVID-related financial toxicity on patient's healthcare and health status.

## Introduction

Globally, the COVID-19 pandemic has infected >770 million people [1], among whom >5–10% have developed persistent symptoms, such as fatigue, cognitive difficulties, and mood changes, collectively known as Long COVID [2–6]. Long COVID, lasting for months, has been associated with increased healthcare utilization, higher disability insurance claims, and reduced productivity [3, 7–16]. Long COVID imposes a significant burden of 80 disability-adjusted life years [DALYs] per 1,000 individuals among non-hospitalized adults and 643 DALYs per 1,000 individuals among hospitalized adults over a two-year period [11]. These rates surpass the burden attributed to either cancer (50 DALYs per 1,000 Americans) or heart disease (52 DALYs per 1,000 Americans) [17]. Consequently, these sequelae incur an estimated total cost exceeding \$2.6 trillion in the US [18], alongside the potential negative repercussions of this economic strain on medical care, known as financial toxicity [19].

Evidence indicates that financial toxicity is prevalent among adults affected by COVID-19 and/or Long COVID, not only in the U.S. [3, 8, 20–22] but also globally [23–25]. It remains uncertain how this compares to the financial toxicity associated with other common comorbidities. Also, we lack understanding of factors associated with higher financial burden in Long COVID. This knowledge gap hampers policymaking for Long COVID care infrastructure and the design and evaluation of interventions to reduce related financial burdens.

Expanding on prior research [22], which utilized data from the 2022 U.S. National Health Interview Survey (NHIS), our study aims to examine the prevalence of financial toxicity among Long COVID patients and individuals who experienced COVID-19 only (without Long COVID), compared to those with common comorbidities. Furthermore, the study seeks to analyze factors correlated with increased financial burden due to Long COVID also using 2022 NHIS.

## Methods

### Data source

The NHIS, initiated in 1957 and conducted annually by the National Center for Health Statistics, employs geographically clustered sampling for nationally representative data collection from civilian, noninstitutionalized populations in all 50 US states and the District of Columbia. NHIS data assist the Department of Health and Human Services (HHS) in monitoring health trends and tracking national health goals. This survey covers demographics, health, behavior, disability, and social functioning. NHIS content undergoes periodic updates, with changes in 2022 specifically to include questions about Long COVID. Interviews typically occur in respondents' homes, with 55.7% partially or entirely conducted by telephone in 2022 due to the COVID-19 pandemic [26, 27]. Under the U.S. Department of Health and Human Services (HHS) regulations for the protection of human subjects in research (45CFR 46), research involving publicly available data sets do not require IRB review.

## Study sample

Our analysis utilized data from the 2022 NHIS Sample Adult Core [28]. We included all participants who have a valid answer and exclude those with missing or unknown answers on COVID-19 questions. COVID-19 infection was identified by a 'yes' response to survey questions: 'Has a doctor or other health professional ever told you that you had or likely had coronavirus or COVID-19?' or 'Did you ever take a test that showed you had coronavirus or COVID-19?' Long COVID was ascertained by a "yes" response to the survey question: 'Did you experience symptoms lasting 3 months or more that were not present before having COVID-19?' among those with mild to severe COVID-19 symptoms [27], aligning with the World Health Organization's definition [29]. The covariates considered in this analysis, as outlined below, were selected based on prior research findings [2–16, 20–22], consistent with methodological recommendations for building regression models [30].

## Sociodemographic data

Sociodemographic variables included age, sex, race/ethnicity, education, marital status, insurance coverage, household income, and sources of income (categorical variable allowing for multiple simultaneous response options). Metropolitan residence was determined using the 2013 NCHS Urban-Rural classification scheme for counties, categorized as "yes" (large central, large fringe, medium, and small metro) or "no" (nonmetropolitan) [27, 31]. Food insecurity was assessed through 10 questions developed by the United States Department of Agriculture [32], with a score of 3–10 defining food insecurity [27, 33].

## Comorbidities and health service utilization

Comorbidity was determined based on self-report doctor-diagnosed conditions (yes/no): hypertension, high cholesterol, epilepsy, diabetes, respiratory conditions (asthma, COPD, emphysema, or chronic bronchitis), cardiovascular conditions (heart attack, coronary heart disease, angina, myocardial infarction, or stroke), arthritis, immunosuppression (weakened immune system due to prescriptions or health condition), dementia, and cancer.

Health service utilization includes yes/no responses regarding visits to urgent care centers or drug/grocery store clinics; hospital emergency room visits; overnight hospitalizations; receipt of physical, speech, or occupational therapy; home care; and counseling or therapy sessions with a mental health professional in the past 12 months.

## Social functioning, mental health, and fatigue

The NHIS assessed disability using the Washington Group Adult Composite Disability Indicator, developed by the World Health Organization (WHO). This measure has been validated and widely adopted as a standardized set of questions for identifying disability prevalence in population health surveys [34–36]. Adults reported their levels of function in vision, hearing, mobility, communication, cognition, and self-care. Individuals responding 'a lot of difficulty' or 'cannot do at all' in at least one of these domains were considered to have a disability [27, 37]. Social functioning was evaluated through two items related to independently completing errands and participation in social activities. Adults indicating "a lot of difficulty" or "cannot do at all" were classified as having an impairment in the corresponding item [27, 37].

Anxiety was evaluated using the 7-item Generalized Anxiety Disorder scale (GAD-7), which includes categories none or minimal (values ranging from 0 to 4) to mild to severe (values ranging from 5 to 21) based on their experiences in the past two weeks [38]. The reliability coefficient Cronbach's  $\alpha$  for the overall GAD-7 scale was 0.895 [39]. Depression was assessed

using the 8-item Patient Health Questionnaire depression scale (PHQ-8), which was categorized into none or minimal (values ranging from 0 to 4) or mild to severe (values ranging from 5 to 24) based on their experiences in the past two weeks [40]. The Cronbach  $\alpha$  for PHQ-8 was 0.82 [41]. Self-reported fatigue experienced during the past 3 months and self-reported moderate to severe COVID-19 symptoms (yes/no) were also collected.

### Primary outcome: Financial toxicity

Financial toxicity was defined based "yes/no" responses to the following items: difficulty paying medical bills, cost-related medication nonadherence (which includes skipping medication doses, taking less medication, delaying filling prescriptions to save money, or not obtaining prescription medication due to cost), delaying healthcare due to cost (referring to dental care, medical care, or counseling/therapy), and not obtained healthcare due to cost [22]. The metrics used in this study have shown robust correlations with objective financial toxicity resulting from out-of-pocket medical expenses in previous research [33, 42–44]. We calculated a composite score that represents the total number of financial toxicities, with scores ranging from 0 to 4. This approach has been used in another study [33]. Detailed content regarding all the questionnaires used in the study can be accessed at [https://ftp.cdc.gov/pub/Health\\_Statistics/NCHS/Survey\\_Questionnaires/NHIS/2022/EnglishQuest-508.pdf](https://ftp.cdc.gov/pub/Health_Statistics/NCHS/Survey_Questionnaires/NHIS/2022/EnglishQuest-508.pdf)

### Analyses

We summarized data using means and SDs for continuous variables, and proportions for categorical variables. We compared data using Student *t* tests for continuous variables, and chi square or Fisher exact tests, as appropriate, for categorical variables. All analyses utilized Stata version 17 (StataCorp, College Station, TX, USA), applying survey weights and the 'svy' command to address the complex survey design of the NHIS and generate nationally representative estimates.[45] Statistical significance was indicated by a two-sided *p*-value <0.05.

To assess financial toxicity prevalence in adults who had Long COVID and who had COVID-19 only (without Long COVID), in comparison to other adults with other comorbidity, we utilized multivariable logistic regression and the 'lincom' command with the NHIS 2022 dataset. The 'lincom' command calculates point estimates, standard errors, and confidence intervals for linear combinations of coefficients subsequent to any estimation command, including survey estimation. The study's binary outcome was whether individuals experienced any financial toxicity (Y/N). Exposure variables included SARS-CoV-2 infection status (Long COVID, COVID-19 only, and uninfected) and 10 comorbidities (yes/no), as described above. Covariates included measures of sociodemographic, health services utilization, disability, social functioning, mental health, and fatigue.

Finally, we utilized bivariable Poisson regression models and a multivariable Poisson model to identify factors associated with higher financial toxicity (indicating a greater total number of financial toxicities) in Long COVID cases. The comprehensive set of potential factors included sociodemographic factors, comorbidities, type of health service utilization, disability, social functioning, mental health, and fatigue [46, 47]. Multicollinearity was not present based on assessment using variance inflation factors (VIF), with a VIF greater than 10 indicating multicollinearity.

### Results

A total of 27,492 NHIS respondents were included in our analysis, representing 253 million U. S. adults. Table 1 presents the participants' characteristics and financial toxicity of 2022 NHIS respondents. Of the 27,492 respondents, 78% were less than 65 years old, 62% were non-

Table 1. Baseline characteristics and financial toxicity in the 2022 NHIS sample stratified by long COVID and SARS-CoV-2-infection status <sup>†</sup>.

| Variables                                                                               | Total<br>(n = 27,492) | With Long COVID<br>(n = 1,797) | With COVID-19 only<br>(n = 8,334) | No COVID-19<br>(n = 17,361) |
|-----------------------------------------------------------------------------------------|-----------------------|--------------------------------|-----------------------------------|-----------------------------|
| <b>Weighted population size, No. (%)</b>                                                | 253,992,780<br>(100)  | 17,610,801 (7)                 | 82,750,025 (33)                   | 153,631,955<br>(60)         |
| <b>Male, % (95% CI), weighted</b>                                                       | 49 (48, 49)           | 37 (34, 40)                    | 50 (48, 51)                       | 50 (49, 50)                 |
| <b>Age &lt; 65 years, % (95% CI), weighted</b>                                          | 78 (77, 78)           | 87 (85, 88)                    | 85 (84, 86)                       | 73 (72, 74)                 |
| <b>Non-Hispanic White, % (95% CI), weighted</b>                                         | 62 (61, 64)           | 64 (61, 67)                    | 61 (60, 63)                       | 62 (61, 64)                 |
| <b>High School Graduate or lower, % (95% CI), weighted</b>                              | 38 (37, 39)           | 34 (31, 37)                    | 34 (33, 35)                       | 40 (39, 41)                 |
| <b>Married or living with a partner, % (95% CI), weighted</b>                           | 60 (60, 61)           | 64 (61, 66)                    | 62 (61, 63)                       | 59 (58, 61)                 |
| <b>Below 200% of the federal poverty level for family income, % (95% CI), weighted.</b> | 28 (27, 29)           | 28 (25, 31)                    | 24 (22, 25)                       | 29 (28, 31)                 |
| <b>Currently work for pay, % (95% CI), weighted.</b>                                    | 61 (60, 62)           | 66 (63, 69)                    | 70 (69, 71)                       | 55 (54, 56)                 |
| <b>Source of income, % (95% CI), weighted.</b>                                          |                       |                                |                                   |                             |
| Wages or salaries                                                                       | 81 (80, 81)           | 86 (84, 88)                    | 87 (87, 88)                       | 76 (76, 77)                 |
| Interest accounts, investments, or trusts                                               | 29 (28, 30)           | 23 (21, 25)                    | 29 (27, 30)                       | 30 (29, 31)                 |
| <b>Non-US Citizen, % (95% CI), weighted</b>                                             | 8.1 (7.5, 8.7)        | 6.4 (5.0, 8.1)                 | 7.9 (7.1, 8.8)                    | 8.4 (7.7, 9.2)              |
| <b>Food insecurity <sup>‡</sup></b>                                                     | 8.0 (7.5, 8.5)        | 13 (11, 15)                    | 6.7 (6.1, 7.5)                    | 8.1 (7.5, 8.7)              |
| <b>Residence in metropolitan area <sup>‡</sup>, % (95% CI), weighted</b>                | 86 (85, 87)           | 85 (82, 87)                    | 87 (86, 88)                       | 86 (85, 87)                 |
| <b>Residence region</b>                                                                 |                       |                                |                                   |                             |
| Northeast                                                                               | 18 (17, 19)           | 17 (15, 20)                    | 19 (17, 20)                       | 17 (16, 18)                 |
| Midwest                                                                                 | 21 (20, 22)           | 22 (20, 25)                    | 21 (19, 22)                       | 21 (19, 22)                 |
| South                                                                                   | 38 (37, 40)           | 36 (33, 39)                    | 38 (37, 40)                       | 38 (37, 40)                 |
| West                                                                                    | 24 (22, 25)           | 25 (22, 28)                    | 22 (21, 24)                       | 24 (23, 26)                 |
| <b>Insured, % (95% CI), weighted</b>                                                    | 90 (90, 91)           | 91 (89, 92)                    | 91 (90, 92)                       | 90 (89, 90)                 |
| <b>Health service utilization, % (95% CI), weighted</b>                                 |                       |                                |                                   |                             |
| Visited urgent care centers or drug/grocery store clinics                               | 33 (32, 33)           | 44 (41, 47)                    | 39 (37, 40)                       | 28 (27, 29)                 |
| Visited hospital emergency room                                                         | 20 (19, 21)           | 32 (30, 35)                    | 20 (19, 21)                       | 18 (18, 19)                 |
| Hospitalized overnight                                                                  | 8.4 (8.0, 8.8)        | 12 (11, 14)                    | 8.5 (7.8, 9.2)                    | 7.9 (7.4, 8.4)              |
| Received counseling/therapy from mental health professional                             | 13 (12, 13)           | 20 (17, 22)                    | 13 (12, 14)                       | 12 (11, 12)                 |
| Care at home from a nurse or other health professional                                  | 3.5 (3.3, 3.8)        | 4.3 (3.3, 5.6)                 | 2.8 (2.5, 3.2)                    | 3.8 (3.5, 4.1)              |
| Received physical/speech/rehabilitative/occupational therapy                            | 12 (11, 12)           | 15 (13, 17)                    | 12 (11, 12)                       | 12 (11, 12)                 |
| <b>Comorbidities, <sup>‡‡</sup> % (95% CI), weighted</b>                                |                       |                                |                                   |                             |
| Hypertension                                                                            | 32 (31, 33)           | 35 (33, 38)                    | 28 (27, 29)                       | 34 (33, 35)                 |
| High cholesterol                                                                        | 27 (27, 28)           | 28 (25, 30)                    | 24 (23, 25)                       | 29 (28, 30)                 |
| Diabetes                                                                                | 9.6 (9.2, 10)         | 11.0 (8.9, 12)                 | 8.2 (7.6, 8.9)                    | 10.0 (9.7, 11.0)            |
| Arthritis                                                                               | 22 (21, 22)           | 27 (25, 29)                    | 17 (16, 18)                       | 23 (23, 24)                 |
| Dementia                                                                                | 1.1 (0.92, 1.2)       | 0.76 (0.42, 1.4)               | 0.62 (0.47, 0.81)                 | 1.3 (1.1, 1.5)              |
| Immunosuppression                                                                       | 7.4 (7.1, 7.8)        | 13 (11, 15)                    | 7.1 (6.4, 7.8)                    | 7.0 (6.5, 7.4)              |
| Epilepsy                                                                                | 1.9 (1.7, 2.1)        | 2.2 (1.5, 3.2)                 | 1.6 (1.3, 2.0)                    | 2.0 (1.7, 2.2)              |
| Cardiovascular conditions                                                               | 8.5 (8.1, 8.8)        | 8.7 (7.3, 10.0)                | 6.3 (5.8, 6.9)                    | 9.6 (9.1, 10.0)             |
| Respiratory conditions                                                                  | 17 (17, 18)           | 27 (25, 30)                    | 17 (16, 18)                       | 16 (16, 17)                 |
| Cancer                                                                                  | 9.6 (9.2, 9.9)        | 9.1 (7.8, 11.0)                | 7.4 (6.8, 8.0)                    | 11.0 (10.0, 11.0)           |
| <b>Disability <sup>‡</sup> % (95% CI), weighted</b>                                     | 9.3 (8.8, 9.7)        | 13 (11, 15)                    | 6.6 (6.0, 7.3)                    | 10 (9.7, 11.0)              |
| <b>Impaired Social Functioning, % (95% CI), weighted</b>                                |                       |                                |                                   |                             |
| Difficulty participating in social activities                                           | 4.4 (4.1, 4.7)        | 4.9 (3.9, 6.1)                 | 3.2 (2.7, 3.7)                    | 4.9 (4.6, 5.4)              |
| Difficulty doing errands alone                                                          | 4.5 (4.2, 4.8)        | 4.5 (3.5, 5.7)                 | 3.0 (2.6, 3.5)                    | 5.3 (4.9, 5.7)              |
| <b>Experience fatigue in past 3 months, % (95% CI), weighted</b>                        | 67 (66, 68)           | 83 (81, 85)                    | 69 (68, 70)                       | 64 (63, 65)                 |

(Continued)

Table 1. (Continued)

| Variables                                                                | Total<br>(n = 27,492) | With Long COVID<br>(n = 1,797) | With COVID-19 only<br>(n = 8,334) | No COVID-19<br>(n = 17,361) |
|--------------------------------------------------------------------------|-----------------------|--------------------------------|-----------------------------------|-----------------------------|
| Mild-Severe anxiety symptoms <sup>c</sup> , % (95% CI), weighted.        | 18 (18, 19)           | 32 (30, 35)                    | 18 (17, 19)                       | 17 (16, 18)                 |
| Mild-Severe depressive symptoms <sup>&amp;</sup> , % (95% CI), weighted. | 21 (21, 22)           | 37 (34, 39)                    | 19 (18, 20)                       | 21 (20, 21)                 |
| Financial Toxicity, % (95% CI), weighted                                 |                       |                                |                                   |                             |
| Experience any financial toxicity <sup>§</sup>                           | 32 (31, 33)           | 47 (44, 50)                    | 31 (30, 32)                       | 31 (30, 31)                 |
| Difficulty Paying for medical bills.                                     | 11 (10, 11)           | 19 (17, 21)                    | 10 (9.4, 11)                      | 10 (9.5, 11)                |
| Cost-related medication nonadherence <sup>*</sup>                        | 7.1 (6.7, 7.4)        | 16 (14, 18)                    | 6.3 (5.7, 7.0)                    | 6.5 (6.0, 7.0)              |
| Delayed healthcare due to cost <sup>§</sup>                              | 20 (19, 21)           | 31 (28, 34)                    | 19 (18, 20)                       | 19 (19, 20)                 |
| Not obtained healthcare due to cost <sup>†</sup>                         | 23 (23, 24)           | 35 (32, 38)                    | 22 (21, 23)                       | 22 (23, 23)                 |
| Total number of financial toxicities, <sup>€</sup> % (95% CI), weighted  |                       |                                |                                   |                             |
| 0                                                                        | 69 (68, 69)           | 54 (51, 56)                    | 70 (68, 71)                       | 70 (69, 71)                 |
| 1                                                                        | 12 (12, 12)           | 15 (13, 17)                    | 12 (11, 13)                       | 12 (11, 12)                 |
| 2                                                                        | 12 (11, 12)           | 16 (14, 18)                    | 12 (11, 12)                       | 12 (11, 12)                 |
| 3                                                                        | 5 (5, 5.7)            | 10 (8, 12)                     | 5 (4, 6)                          | 5 (5, 6)                    |
| 4                                                                        | 2 (2, 3)              | 6 (5, 7)                       | 2 (2, 2)                          | 2 (2, 2)                    |

<sup>†</sup> The sizes of populations of each group were estimated with the complex survey design and survey weights of the National Health Interview Survey. All presented percentages are weighted. All presented percentages are weighted.

<sup>\*</sup> Assessed with the 2013 NCHS Urban-Rural classification scheme for counties, participants were categorized as "yes" (encompassing large central, large fringe, medium, and small metro areas) or "no" (nonmetropolitan).

<sup>§</sup> Assessed through a set of 10 questions sponsored by the United States Department of Agriculture, food security levels were defined as "food secure" for values ranging from 0 to 2 and "low to very low" for values ranging from 3 to 10.

<sup>\*\*</sup> Immunosuppression, characterized by a weakened immune system due to prescriptions or underlying health conditions. Cardiovascular conditions, including heart attack, coronary heart disease, angina, myocardial infarction, or stroke. Respiratory conditions, including asthma, COPD, emphysema, or chronic bronchitis. Assessed using the Washington Group Adult Composite Disability Indicator across seeing, hearing, mobility, communication, cognition, and self-care domains. Individuals reporting 'a lot of difficulty' or 'cannot do at all' in at least one domain were considered to have a disability.

<sup>€</sup> Assessed with the 7-item Generalized Anxiety Disorder scale, respondents were categorized into two groups at the time of completing the 2022 National Health Interview Survey (NHIS): none/minimal (0–4) and mild to severe (5–21).

<sup>&</sup> Assessed with the 8-item Patient Health Questionnaire depression scale, respondents were categorized into two groups at the time of completing the 2022 National Health Interview Survey (NHIS): none/minimal (0–4) and mild to severe (5–24)

<sup>§</sup> In the past 12 months, individuals have experienced difficulty paying for medical bills, cost-related medication nonadherence, delayed care due to cost, or not obtained healthcare due to cost.

<sup>\*</sup> In the past 12 months, individuals skipped medication doses, took less medication, delayed filling prescriptions to save money, or needed prescription medication but did not obtain it due to cost.

<sup>§</sup> In the past 12 months, dental care, medical care, or counseling/therapy has been delayed due to cost.

<sup>†</sup> In the past 12 months, there has been a need for dental care, medical care, or counseling/therapy that wasn't obtained due to cost.

<sup>€</sup> A sum was calculated based on whether the respondent had: difficulty paying for medical bills, cost-related medication nonadherence, delayed care due to cost, or not obtained healthcare due to cost. The range of the sum is from 0 to 4.

Abbreviations: 95% confidence interval = 95% CI

<https://doi.org/10.1371/journal.pone.0309116.t001>

Hispanic white, 38% had a high school education or lower, 28% had family income below 200% of the federal poverty level, 10% were uninsured, and 8% experienced food insecurity. Notably, 8,334 (33%) had COVID-19 only, while 1,797 (7%) had Long COVID. Financial toxicity was reported by 32% of 2022 NHIS respondents. In the cohort of adults with long COVID, 47% reported experiencing financial toxicity. In contrast, among those with COVID-19 alone, 31% experienced financial toxicity. Regardless of the SARS-CoV-2 infection status (Long COVID, COVID-19 only, and uninfected), the three most commonly-reported types of



financial toxicity were consistent: healthcare not obtained due to cost, delayed healthcare due to cost, and difficulty paying for medical bills ([Table 1](#)).

### Prevalence of financial toxicity by SARS-CoV-2 infection vs. other comorbidities

In a multivariable logistic regression analysis, adults with Long COVID exhibited higher odds of experiencing financial toxicity compared to both uninfected adults with various chronic diseases and healthy controls (uninfected individuals without any comorbidities). These included epilepsy (OR [95% CI]: 1.69 [1.22, 2.33],  $p = 0.002$ ), dementia (1.51 [1.01, 2.25],  $p = 0.04$ ), cancer (1.43 [1.19, 1.71],  $p < 0.001$ ), respiratory conditions (1.18 [1.00, 1.40],  $p = 0.05$ ), high cholesterol (1.27 [1.08, 1.49],  $p = 0.004$ ), cardiovascular conditions (1.23 [1.02, 1.47],  $p = 0.03$ ), hypertension (1.28 [1.09, 1.51],  $p = 0.002$ ), and health control (1.39 [1.21, 1.59],  $p < 0.001$ ) ([Table 2](#) and [Fig 1](#)). In contrast, those who had COVID-19 alone did not show increased odds.

### Associated factors for greater financial toxicities in long COVID

Several factors were positively associated with financial toxicity indicators among individuals with Long COVID. These factors include female sex, age under 65 years, lacking insurance, currently employed, residence region, experiencing food insecurity, fatigue, and exhibiting mild to severe symptoms of depression. Additionally, individuals who visited hospital emergency rooms, had arthritis, cardiovascular or respiratory conditions, and experienced difficulty participating in social activities reported a greater number of financial toxicities. Conversely, individuals with Long COVID who relied on primary income from investments experienced fewer financial toxicities compared to those who did not ([Table 3](#)).

## Discussion

Analyzing the 2022 U.S. NHIS, adults with Long COVID demonstrated a higher prevalence of financial toxicity indicators compared to individuals with various comorbidities (e.g., epilepsy, dementia, respiratory or cardiovascular conditions, cancer). This observation persisted even after adjusting for social demographic factors, healthcare utilization, and functional status. This difference was especially evident in specific toxicity measures, including not obtaining healthcare due to cost, delayed healthcare due to cost, and difficulty paying for medical bills. Factors associated with a higher total number of financial toxicity indicators in Long COVID included female sex, age  $< 65$  years, lack of medical insurance, current paid employment, food insecurity, fatigue, mild to severe depression symptoms experienced during the survey completion, visits to hospital emergency rooms, presence of arthritis, cardiovascular or respiratory conditions, and social activity limitations.

Our study demonstrates a significant prevalence of financial toxicity among adults with Long COVID, aligning with findings from previous U.S.-based studies [[3](#), [8](#), [20–22](#)] as well as international research [[23–25](#)]. A potential explanation is that chronic inflammation or other physiological processes causing prolonged symptoms, disability, or an elevated risk of developing cardiovascular disease [[48](#)], diabetes [[49](#)], neuropsychiatric sequelae [[50](#)], and acute or post-acute respiratory sequelae [[51](#)] could result in diminished work capacity [[52](#)], increased healthcare needs [[53](#)], and thereby contribute to financial burden. Further study is warranted to better understand the mechanisms underlying these effects. Additionally, our study contributes important new insights into this phenomenon. Firstly, this is the first study directly comparing financial toxicity among adults with Long COVID and who had COVID-19 only to adults with various comorbidities. Our results highlight those individuals with Long COVID, but not those who had COVID-19 only, face a greater financial burden than those with other

**Table 2. Associations of risk factors for indicator for experiencing any financial toxicity in the national health interview survey, 2022 cohort (n = 25,056, weighted sample = 229,940,018) <sup>†</sup>.**

| Variables                                                        | Bivariable logistic regression |         | Multivariable logistic regression |         |
|------------------------------------------------------------------|--------------------------------|---------|-----------------------------------|---------|
|                                                                  | OR (95% CI)                    | p value | OR (95% CI)                       | p value |
| <b>SARS-CoV-2-infection Status</b>                               |                                |         |                                   |         |
| No COVID-19                                                      | Reference                      |         | Reference                         |         |
| COVID-19 only                                                    | 1.01 (0.94, 1.08)              | 0.81    | 1.00 (0.93, 1.08)                 | 0.93    |
| Long COVID                                                       | 1.99 (1.78, 2.24)              | <0.001  | 1.39 (1.22, 1.59)                 | <0.001  |
| <b>Male</b>                                                      | 0.76 (0.71, 0.81)              | <0.001  | 0.84 (0.77, 0.91)                 | <0.001  |
| <b>Age &lt; 65 years</b>                                         | 1.76 (1.64, 1.89)              | <0.001  | 1.30 (1.16, 1.46)                 | <0.001  |
| <b>Non-Hispanic White</b>                                        | 0.66 (0.62, 0.71)              | <0.001  | 0.95 (0.87, 1.04)                 | 0.31    |
| <b>High School Graduate or lower</b>                             | 1.53 (1.44, 1.64)              | <0.001  | 1.07(0.99, 1.16)                  | 0.10    |
| <b>Married or living with partner</b>                            | 0.76 (0.71, 0.81)              | <0.001  | 0.96 (0.89, 1.03)                 | 0.28    |
| <b>Below 200% of the federal poverty level for family income</b> | 2.37 (2.21, 2.55)              | <0.001  | 1.45 (1.32, 1.59)                 | <0.001  |
| <b>Currently work for pay</b>                                    | 0.99 (0.93, 1.06)              | 0.86    | 1.11 (1.01, 1.24)                 | 0.04    |
| <b>Source of income</b>                                          |                                |         |                                   |         |
| Wages or salaries                                                | 1.16 (1.07, 1.25)              | <0.001  | 1.20 (1.06, 1.35)                 | 0.003   |
| Interest accounts, investments, or trusts                        | 0.42 (0.39, 0.46)              | <0.001  | 0.64 (0.58, 0.69)                 | <0.001  |
| <b>Non-US citizenship</b>                                        | 1.91 (1.69, 2.16)              | <0.001  | 1.30 (1.11, 1.51)                 | 0.001   |
| <b>Food Insecurity <sup>‡</sup></b>                              | 5.41 (4.77, 6.13)              | <0.001  | 2.67 (2.33, 3.06)                 | <0.001  |
| <b>Residence in metropolitan area <sup>‡</sup></b>               | 0.99 (0.89, 1.10)              | 0.79    | 1.09 (0.95, 1.24)                 | 0.22    |
| <b>Residence Region</b>                                          |                                |         |                                   |         |
| Northeast                                                        | Reference                      |         | Reference                         |         |
| Midwest                                                          | 1.15 (1.02, 1.28)              | 0.02    | 1.08 (0.94, 1.24)                 | 0.27    |
| South                                                            | 1.51 (1.36, 1.68)              | <0.001  | 1.31 (1.16, 1.49)                 | <0.001  |
| West                                                             | 1.33 (1.18, 1.50)              | <0.001  | 1.27 (1.11, 1.46)                 | <0.001  |
| <b>Insured</b>                                                   | 0.25 (0.23, 0.28)              | <0.001  | 0.28 (0.25, 0.32)                 | <0.001  |
| <b>Health service utilization</b>                                |                                |         |                                   |         |
| Visited urgent care centers or drug/grocery store clinics        | 1.23 (1.15, 1.31)              | <0.001  | 1.12 (1.03, 1.21)                 | 0.008   |
| Visited hospital emergency room                                  | 2.00 (1.86, 2.15)              | <0.001  | 1.36 (1.24, 1.49)                 | <0.001  |
| Hospitalized overnight                                           | 1.61 (1.46, 1.78)              | <0.001  | 1.16 (1.02, 1.32)                 | 0.03    |
| Received counseling/therapy from mental health professional      | 2.02 (1.86, 2.20)              | <0.001  | 1.30 (1.17, 1.46)                 | <0.001  |
| Care at home from a nurse or other health professional           | 1.02 (0.87, 1.20)              | 0.77    | 0.68 (0.55, 0.85)                 | 0.001   |
| Received physical/speech/rehabilitative/occupational therapy     | 1.10 (1.00, 1.20)              | 0.04    | 1.04 (0.93, 1.17)                 | 0.49    |
| <b>Comorbidities<sup>**</sup></b>                                |                                |         |                                   |         |
| Hypertension                                                     | 1.11 (1.04, 1.19)              | 0.002   | 1.08 (0.99, 1.18)                 | 0.08    |
| High cholesterol                                                 | 1.04 (0.97, 1.11)              | 0.24    | 1.10 (1.01, 1.20)                 | 0.04    |
| Diabetes                                                         | 1.38 (1.26, 1.51)              | <0.001  | 1.23 (1.09, 1.38)                 | 0.001   |
| Arthritis                                                        | 1.31 (1.22, 1.41)              | <0.001  | 1.30 (1.18, 1.43)                 | <0.001  |
| Dementia                                                         | 1.02 (0.78, 1.35)              | 0.86    | 0.92 (0.63, 1.34)                 | 0.67    |
| Immunosuppression                                                | 1.75 (1.57, 1.94)              | <0.001  | 1.35 (1.18, 1.55)                 | <0.001  |
| Epilepsy                                                         | 1.40 (1.13, 1.73)              | 0.002   | 0.82 (0.62, 1.10)                 | 0.19    |
| Cardiovascular conditions                                        | 1.26 (1.14, 1.40)              | <0.001  | 1.13 (0.999, 1.28)                | 0.051   |
| Respiratory conditions                                           | 1.57 (1.45, 1.69)              | <0.001  | 1.17(1.07, 1.29)                  | 0.001   |
| Cancer                                                           | 0.80 (0.72, 0.88)              | <0.001  | 0.97 (0.86, 1.11)                 | 0.67    |
| <b>Disability</b>                                                | 1.88 (1.70, 2.07)              | <0.001  | 1.07 (0.92, 1.24)                 | 0.38    |
| <b>Impaired Social Functioning</b>                               |                                |         |                                   |         |
| Difficulty doing errands alone                                   | 1.44 (1.26, 1.64)              | <0.001  | 0.87 (0.69, 1.10)                 | 0.25    |
| Difficulty participating in social activities                    | 1.88 (1.64, 2.15)              | <0.001  | 0.93 (0.74, 1.17)                 | 0.54    |

(Continued)



Table 2. (Continued)

| Variables                                         | Bivariable logistic regression |         | Multivariable logistic regression |         |
|---------------------------------------------------|--------------------------------|---------|-----------------------------------|---------|
|                                                   | OR (95% CI)                    | p value | OR (95% CI)                       | p value |
| Experience fatigue in past 3 months               | 2.00 (1.87, 2.14)              | <0.001  | 1.40 (1.29, 1.51)                 | <0.001  |
| Mild -Severe anxiety symptoms <sup>c</sup>        | 3.22 (2.98, 3.49)              | <0.001  | 1.66 (1.49, 1.86)                 | <0.001  |
| Mild -Severe depressive symptoms <sup>&amp;</sup> | 3.15 (2.92, 3.39)              | <0.001  | 1.62 (1.45, 1.80)                 | <0.001  |

<sup>†</sup> The sizes of populations of each group were estimated with the complex survey design and survey weights of the National Health Interview Survey. All presented percentages are weighted. All presented percentages are weighted.

<sup>‡</sup> Assessed with the 2013 NCHS Urban-Rural classification scheme for counties, participants were categorized as "yes" (encompassing large central, large fringe, medium, and small metro areas) or "no" (nonmetropolitan).

<sup>§</sup> Assessed through a set of 10 questions sponsored by the United States Department of Agriculture, food security levels were defined as "food secure" for values ranging from 0 to 2 and "low to very low" for values ranging from 3 to 10.

<sup>\*\*</sup> Immunosuppression, characterized by a weakened immune system due to prescriptions or underlying health conditions. Cardiovascular conditions, including heart attack, coronary heart disease, angina, myocardial infarction, or stroke. Respiratory conditions, including asthma, COPD, emphysema, or chronic bronchitis. Assessed using the Washington Group Adult Composite Disability Indicator across seeing, hearing, mobility, communication, cognition, and self-care domains. Individuals reporting 'a lot of difficulty' or 'cannot do at all' in at least one domain were considered to have a disability.

<sup>c</sup> Assessed with the 7-item Generalized Anxiety Disorder scale, respondents were categorized into two groups at the time of completing the 2022 National Health Interview Survey (NHIS): none/minimal (0–4) and mild to severe (5–21).

<sup>&</sup> Assessed with the 8-item Patient Health Questionnaire depression scale, respondents were categorized into two groups at the time of completing the 2022 National Health Interview Survey (NHIS): none/minimal (0–4) and mild to severe (5–24)

<sup>§</sup> In the past 12 months, individuals have experienced difficulty paying for medical bills, cost-related medication nonadherence, delayed care due to cost, or not obtained healthcare due to cost.

<sup>\*</sup> In the past 12 months, individuals skipped medication doses, took less medication, delayed filling prescriptions to save money, or needed prescription medication but did not obtain it due to cost.

<sup>§</sup> In the past 12 months, dental care, medical care, or counseling/therapy has been delayed due to cost.

<sup>†</sup> In the past 12 months, there has been a need for dental care, medical care, or counseling/therapy that wasn't obtained due to cost.

<sup>€</sup> A sum was calculated based on whether the respondent had: difficulty paying for medical bills, cost-related medication nonadherence, delayed care due to cost, or not obtained healthcare due to cost. The range of the sum is from 0 to 4.

Abbreviations: 95% confidence interval = 95% CI; Odds Ratio = OR

<sup>†</sup> The odds ratio was estimated through multivariable logistic regression, as presented in Table 2 using the 'lincom' command. In each disease model, the reference group was set as the specific disease, with Long COVID or COVID-19 only serving as the comparison group. COVID-19 cases were identified via self-report positive testing or physician diagnoses, while Long COVID involves COVID-19-related symptoms persisting for more than 3 months.

Respiratory conditions, including asthma, COPD, emphysema, or chronic bronchitis, and cardiovascular conditions, such as heart attack, coronary heart disease, angina, myocardial infarction, or stroke, were considered. Immunosuppression, characterized by a weakened immune system due to prescriptions or underlying health conditions, was also included.

Healthy controls are defined as those uninfected individuals without any comorbidities.

Each disease model was adjusted for various demographic and health-related factors, including sex, age, race/ethnicity, education, marital status, family income, insurance coverage, and other 9 comorbidities. Additional adjustments were made for citizenship, residence in metropolitan areas, residence region, income sources, health service utilization, disability, social functioning, mental health, and fatigue. Analytic weights were applied to account for the complex sampling design.

In the graphical representation, each circle symbolizes one estimate, with the center indicating the point estimate (odds ratio) of the effect size, and the horizontal lines indicating the confidence interval around that estimate.

Abbreviations: Odds Ratio = OR, 95% Confidence Interval = 95% CI.

<https://doi.org/10.1371/journal.pone.0309116.t002>

chronic diseases, underscoring the significant impact of Long COVID-related financial toxicity. Second, financial toxicity encompasses both objective and subjective domains. Understanding subjective financial toxicity is crucial for evaluating how financial challenges affect healthcare delivery and the potential for seeking care [54]. Building on existing knowledge, we highlight the subjective domains, finding that the Long COVID-related financial burden adversely affects health-seeking behavior and medication adherence, potentially worsening

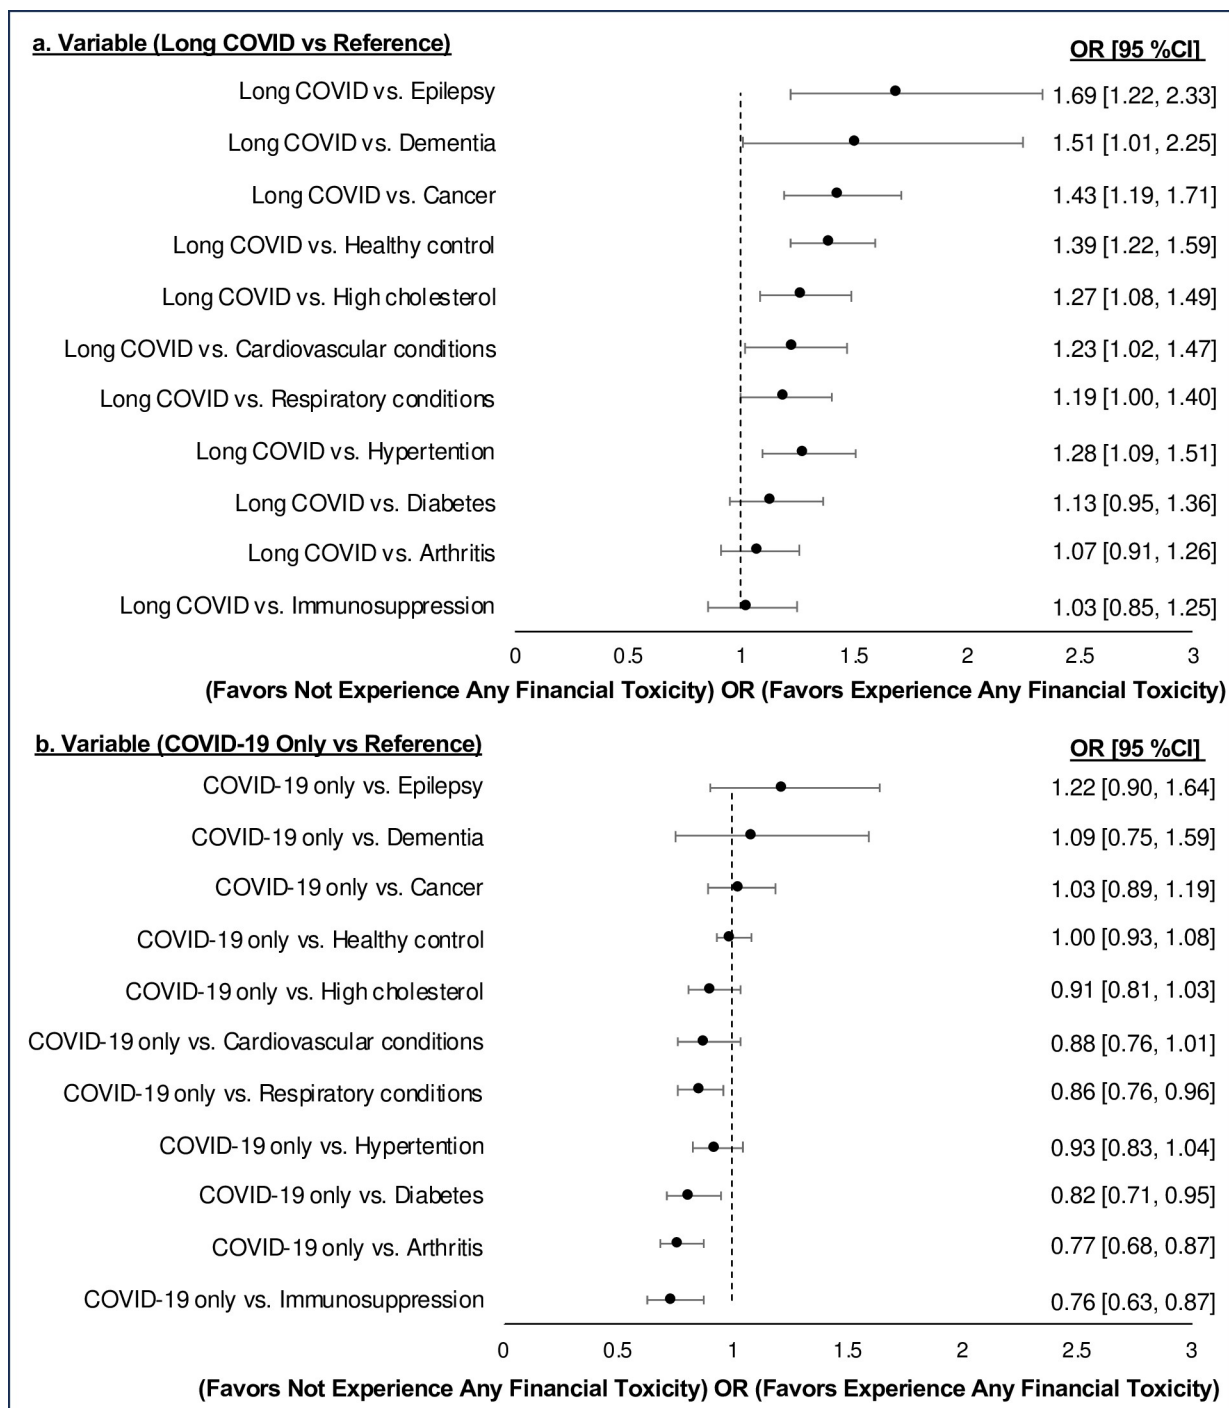

**Fig 1.** Odds Ratio for Experiencing Financial Toxicity in Adults with (a) Long COVID and (b) COVID-19 Only Compared to Uninfected Adults with Various Comorbidities in the National Health Interview Survey, 2022 Cohort (n = 25,056, weighted sample = 229,940,018) <sup>†</sup>.

<https://doi.org/10.1371/journal.pone.0309116.g001>

health conditions and increasing morbidity and mortality. Third, our study identifies multifaceted factors associated with increased financial toxicity in adults with Long COVID, particularly among vulnerable populations, including individuals with low socioeconomic status, food insecurity, comorbidities, and no insurance. This underscores the need for implementing

**Table 3. Bivariable and multivariable associations of risk factors for number of financial toxicity indicators in individuals with long COVID from the national health interview survey, 2022 (n = 1774, weighted sample = 17,295,036) <sup>†</sup>.**

| Variables                                                        | Bivariable Poisson regression |         | Multivariable Poisson regression |         |
|------------------------------------------------------------------|-------------------------------|---------|----------------------------------|---------|
|                                                                  | IRR (95% CI)                  | p value | IRR (95% CI)                     | p value |
| <b>Male</b>                                                      | 0.69 (0.59, 0.81)             | <0.001  | 0.81 (0.70, 0.93)                | 0.004   |
| <b>Age &lt; 65 years</b>                                         | 1.52 (1.25, 1.84)             | <0.001  | 1.31 (1.04, 1.67)                | 0.03    |
| <b>Non-Hispanic White</b>                                        | 0.79 (0.69, 0.91)             | 0.001   | 0.98 (0.84, 1.15)                | 0.82    |
| <b>High School Graduate or lower</b>                             | 1.33 (1.16, 1.52)             | <0.001  | 1.11 (0.95, 1.29)                | 0.18    |
| <b>Married or living with a partner</b>                          | 0.74 (0.64, 0.86)             | <0.001  | 0.94 (0.81, 1.09)                | 0.43    |
| <b>Below 200% of the federal poverty level for family income</b> | 1.77 (1.53, 2.04)             | <0.001  | 1.05 (0.89, 1.24)                | 0.53    |
| <b>Currently work for pay</b>                                    | 0.87 (0.75, 1.02)             | 0.08    | 1.21 (1.03, 1.43)                | 0.02    |
| <b>Source of income</b>                                          |                               |         |                                  |         |
| Wages or salaries                                                | 0.94 (0.77, 1.14)             | 0.51    | 1.07 (0.86, 1.34)                | 0.53    |
| Interest accounts, investments, or trusts                        | 0.65 (0.54, 0.79)             | <0.001  | 0.82 (0.70, 0.97)                | 0.02    |
| <b>Non-US Citizen</b>                                            | 1.61 (1.29, 2.00)             | <0.001  | 1.14 (0.90, 1.44)                | 0.29    |
| <b>Food insecurity <sup>‡</sup></b>                              | 2.66 (2.33, 3.05)             | <0.001  | 1.66 (1.42, 1.93)                | <0.001  |
| <b>Residence in metropolitan area <sup>‡</sup></b>               | 1.08 (0.90, 1.31)             | 0.41    | 1.18 (0.98, 1.43)                | 0.08    |
| <b>Residence region</b>                                          |                               |         |                                  |         |
| Northeast                                                        | Reference                     |         | Reference                        |         |
| Midwest                                                          | 1.07 (0.82, 1.40)             | 0.63    | 1.06 (0.82, 1.37)                | 0.66    |
| South                                                            | 1.25 (0.98, 1.60)             | 0.07    | 1.26 (1.00, 1.58)                | 0.05    |
| West                                                             | 1.29 (1.00, 1.66)             | 0.05    | 1.27 (0.99, 1.62)                | 0.053   |
| <b>Insured</b>                                                   | 0.48 (0.41, 0.57)             | <0.001  | 0.52 (0.43, 0.64)                | 0.00    |
| <b>Health service utilization</b>                                |                               |         |                                  |         |
| Visited urgent care centers or drug/grocery store clinics        | 1.20 (1.04, 1.38)             | 0.01    | 1.10 (0.96, 1.25)                | 0.18    |
| Visited hospital emergency room                                  | 1.74 (1.51, 2.00)             | <0.001  | 1.24 (1.07, 1.43)                | 0.004   |
| Hospitalized overnight.                                          | 1.58 (1.33, 1.87)             | <0.001  | 1.11 (0.91, 1.36)                | 0.28    |
| Received counseling/therapy from mental health professional      | 1.55 (1.34, 1.79)             | <0.001  | 1.02 (0.87, 1.19)                | 0.82    |
| Care at home from a nurse or other health professional           | 1.52 (1.16, 2.00)             | 0.003   | 1.07 (0.76, 1.49)                | 0.71    |
| Received physical/speech/rehabilitative/occupational therapy     | 1.21(0.99, 1.47)              | 0.06    | 0.92 (0.75, 1.12)                | 0.39    |
| <b>Comorbidities<sup>**</sup></b>                                |                               |         |                                  |         |
| Hypertension                                                     | 1.12 (0.97, 1.30)             | 0.11    | 1.05 (0.90, 1.22)                | 0.55    |
| High cholesterol                                                 | 1.10 (0.94, 1.28)             | 0.23    | 1.09 (0.93, 1.28)                | 0.29    |
| Diabetes                                                         | 1.32 (1.08, 1.61)             | 0.007   | 1.03 (0.84, 1.26)                | 0.80    |
| Arthritis                                                        | 1.46 (1.28, 1.67)             | <0.001  | 1.19 (1.03, 1.38)                | 0.02    |
| Dementia                                                         | 1.68 (1.00, 2.81)             | 0.05    | 0.93 (0.62, 1.39)                | 0.71    |
| Immunosuppression                                                | 1.62 (1.36, 1.92)             | <0.001  | 1.05 (0.89, 1.25)                | 0.55    |
| Epilepsy                                                         | 1.44 (1.06, 1.96)             | 0.02    | 0.84 (0.57, 1.24)                | 0.37    |
| Cardiovascular conditions                                        | 1.52 (1.27, 1.82)             | <0.001  | 1.41 (1.16, 1.69)                | <0.001  |
| Respiratory conditions                                           | 1.51 (1.31, 1.73)             | <0.001  | 1.20 (1.03, 1.39)                | 0.02    |
| Cancer                                                           | 1.21 (0.98, 1.49)             | 0.08    | 1.16 (0.95, 1.41)                | 0.16    |
| <b>Disability</b>                                                | 1.80 (1.53, 2.10)             | <0.001  | 1.05 (0.87, 1.28)                | 0.60    |
| <b>Impaired Social Functioning</b>                               |                               |         |                                  |         |
| Difficulty participating in social activities                    | 2.04 (1.69, 2.47)             | <0.001  | 1.40 (1.08, 1.83)                | 0.01    |
| Difficulty doing errands alone                                   | 1.98 (1.60, 2.47)             | <0.001  | 0.90 (0.67, 1.2)                 | 0.47    |
| <b>Experience fatigue in past 3 months</b>                       | 1.97 (1.53, 2.53)             | <0.001  | 1.38 (1.08, 1.76)                | 0.01    |
| <b>Mild-Severe anxiety symptoms</b>                              | 1.93 (1.68, 2.21)             | <0.001  | 1.12 (0.94, 1.33)                | 0.20    |
| <b>Mild-Severe depressive symptoms<sup>&amp;</sup></b>           | 2.18 (1.88, 2.53)             | <0.001  | 1.50 (1.25, 1.81)                | <0.001  |

(Continued)

Table 3. (Continued)

| Variables                                                                             | Bivariable Poisson regression |         | Multivariable Poisson regression |         |
|---------------------------------------------------------------------------------------|-------------------------------|---------|----------------------------------|---------|
|                                                                                       | IRR (95% CI)                  | p value | IRR (95% CI)                     | p value |
| Experience moderate to severe COVID-19 symptoms at their worst during acute infection | 1.35 (1.11, 1.63)             | 0.003   | 1.18 (0.99, 1.39)                | 0.06    |

<sup>†</sup> The sizes of populations of each group were estimated with the complex survey design and survey weights of the National Health Interview Survey. All presented percentages are weighted. All presented percentages are weighted.

<sup>\*</sup> Assessed with the 2013 NCHS Urban-Rural classification scheme for counties, participants were categorized as "yes" (encompassing large central, large fringe, medium, and small metro areas) or "no" (nonmetropolitan).

<sup>‡</sup> Assessed through a set of 10 questions sponsored by the United States Department of Agriculture, food security levels were defined as "food secure" for values ranging from 0 to 2 and "low to very low" for values ranging from 3 to 10.

<sup>\*\*</sup> Immunosuppression, characterized by a weakened immune system due to prescriptions or underlying health conditions. Cardiovascular conditions, including heart attack, coronary heart disease, angina, myocardial infarction, or stroke. Respiratory conditions, including asthma, COPD, emphysema, or chronic bronchitis. Assessed using the Washington Group Adult Composite Disability Indicator across seeing, hearing, mobility, communication, cognition, and self-care domains. Individuals reporting 'a lot of difficulty' or 'cannot do at all' in at least one domain were considered to have a disability.

<sup>‡‡</sup> Assessed with the 7-item Generalized Anxiety Disorder scale, respondents were categorized into two groups at the time of completing the 2022 National Health Interview Survey (NHIS): none/minimal (0–4) and mild to severe (5–21).

<sup>‡‡‡</sup> Assessed with the 8-item Patient Health Questionnaire depression scale, respondents were categorized into two groups at the time of completing the 2022 National Health Interview Survey (NHIS): none/minimal (0–4) and mild to severe (5–24)

Abbreviation: 95% confidence interval = 95% CI, Incidence Rate Ratio = IRR

<https://doi.org/10.1371/journal.pone.0309116.t003>

multilevel interventions involving patients, healthcare providers, as well as insurance and governmental-level initiatives to address Long COVID-related financial toxicity.

Currently, interventions involving both patients and healthcare providers have been developed to reduce the financial burden associated with medical care across a broad spectrum of disease populations [55, 56]. These interventions include screening individuals for medical-related financial hardships and social risk factors, enhancing discussions between patients and providers regarding healthcare costs, and providing financial education, counseling, and navigation services [55]. These interventions, shown to enhance patient financial literacy, alleviate anxiety related to healthcare costs, and improve treatment adherence [55], could be adapted for Long COVID. However, these interventions alone will not eliminate out-of-pocket expenses and associated perceived financial burden [55]. Therefore, additional efforts to evaluate methods to reduce financial toxicity are necessary.

During the early pandemic, the US needed to address issues related to the affordability of COVID-19 testing, vaccines, and treatment [57]. Government initiatives, including the Families First Coronavirus Response Act (FFCRA) and the Coronavirus Aid, Relief, and Economic Security Act (CARES), aimed to alleviate financial burdens [57, 58]. Despite these efforts, survivors with COVID-19 and Long COVID continue to face financial challenges [3, 9, 11, 16, 22, 59], emphasizing the need for ongoing legislative efforts to address out-of-pocket expenses. Additionally, large-scale healthcare reforms for universal access to affordable care could better meet individual healthcare needs and equip the nation for future health crises [60]. For working-age individuals with Long COVID, facilitating employment opportunities is crucial for financial stability and continued access to healthcare insurance [18]. Such work accommodations may include flexible work schedules and telework support to help reduce Long COVID-related delays in return to employment.

Previous research has demonstrated that, compared to uninfected controls, survivors of acute COVID-19 experience a substantial 12-month disease burden, with hazard ratios (HR) per 1,000 persons for cardiovascular disease and diabetes reported as 45.29 [42.22, 48.45] and

13.46 [12.11, 14.84], respectively[48, 49]. Our study highlights that the burden of cardiovascular disease in Long COVID survivors is associated with an increased likelihood of experiencing financial toxicity, a relationship not observed for diabetes. Future research should explore the mechanisms linking disease burden, particularly cardiovascular disease, to financial toxicity to develop strategies to mitigate these effects. Interestingly, our study indicates that individuals with Long COVID residing in the Midwest or Southern regions of the United States are more likely to experience a greater number of financial toxicities compared to those living in the Northeast. This disparity may be attributed to the distinct economic activities and environmental characteristics inherent to each region, which can influence financial burdens. Future research should investigate the specific factors contributing to these regional differences in financial toxicity.

Our study has notable strengths, including a comprehensive analysis of the prevalence and magnitude of financial toxicity in Long COVID, utilizing a nationally representative cohort. By comparing Long COVID patients with those with other diseases, we highlight the distinct burden of Long COVID-related financial toxicity. Furthermore, we identify factors associated with Long COVID-related financial toxicity, providing valuable insights for interventions and policy development. Potential limitations include potential bias and measurement error through self-reporting. However, the NHIS is a nationally recognized survey administered by the U.S. government, with NHIS employing rigorous techniques enhance response rates and ensure data quality. This NHIS methodology fosters greater candor and reduces potential biases associated with socially desirable responses, while also helping to address respondent fatigue, impatience, and accommodating individuals with cognitive and hearing impairments [61]. In order to mitigate biases arising from coverage, nonresponse, and sampling variability, NHIS weighting procedures systematically incorporate adjustments to align estimates with US Census Bureau population data. This process includes harmonizing estimates across demographics such as age, sex, race, ethnicity, educational attainment, and subnational geographical factors such as census division and metropolitan statistical area classification [62].

Moreover, the cross-sectional nature of the survey prevents us from establishing causality. Although it is not possible to randomize someone to having vs. not having Long COVID, further causal inference studies are required to help ascertain whether financial toxicity is caused by Long COVID. Despite our adjustments for potential confounders, residual confounding may remain. Factors such as the severity of comorbid conditions, the type and duration of Long COVID symptoms [63], and variability in COVID-19 treatments—such as vaccination [64] and administration of antiviral treatments [65].

In addition, although we examined the financial burden from various perspectives, our approach may not fully capture its entirety. Specifically, it may not account for instances of declared bankruptcy, depletion of savings, or the inability to pay for necessities. Future studies could explore the incorporation of qualitative data to achieve a more nuanced understanding. Lastly, adults in the US incur greater out-of-pocket healthcare expenses than other countries that may limit the international generalizability of these findings.

## Conclusion

Adults with Long COVID were more likely to experience financial toxicity compared to individuals with various comorbidities (e.g., epilepsy, dementia, respiratory or cardiovascular conditions, cancer). This finding was specific to Long COVID in those adults with COVID only (i.e., SARS CoV2 infection without Long COVID) did not have increased financial toxicity. Factors associated with increased financial toxicity in Long COVID included markers of social vulnerability, such as lower income, lack of healthcare insurance, and food insecurity. This

finding emphasizes the need to explore and evaluate strategies to reduce the economic burden and improve healthcare for adults with Long COVID in order to maximize long-term health and well-being.

## Acknowledgments

We express our gratitude to Theodore J Iwashyna, MD, PhD., for thoroughly reviewing the manuscript and providing invaluable input and suggest.

## Author Contributions

**Conceptualization:** Han Su, Hilaire J. Thompson, Mayur Bipin Patel, Dale M. Needham.

**Data curation:** Han Su.

**Formal analysis:** Han Su.

**Investigation:** Han Su.

**Methodology:** Han Su, Hilaire J. Thompson.

**Project administration:** Han Su.

**Resources:** Han Su.

**Software:** Han Su.

**Supervision:** Hilaire J. Thompson, Dale M. Needham.

**Writing – original draft:** Han Su.

**Writing – review & editing:** Hilaire J. Thompson, Karl Cristie Figuracion, Mayur Bipin Patel, Dale M. Needham.

## References

1. WHO. WHO Coronavirus (COVID-19) Dashboard 2023 [Available from: <https://covid19.who.int>
2. O'Mahoney LL, Routen A, Gillies C, Ekezie W, Welford A, Zhang A, et al. The prevalence and long-term health effects of Long Covid among hospitalised and non-hospitalised populations: A systematic review and meta-analysis. *EClinicalMedicine*. 2023; 55:101762. <https://doi.org/10.1016/j.eclinm.2022.101762> PMID: 36474804
3. Admon AJ, Iwashyna TJ, Kamphuis LA, Gundel SJ, Sahetya SK, Peltan ID, et al. Assessment of Symptom, Disability, and Financial Trajectories in Patients Hospitalized for COVID-19 at 6 Months. *JAMA Netw Open*. 2023; 6(2):e2255795.
4. Chen C, Haupt SR, Zimmermann L, Shi X, Fritsche LG, Mukherjee B. Global Prevalence of Post-Coronavirus Disease 2019 (COVID-19) Condition or Long COVID: A Meta-Analysis and Systematic Review. *J Infect Dis*. 2022; 226(9):1593–607. <https://doi.org/10.1093/infdis/jiac136> PMID: 35429399
5. The L. Long COVID: 3 years in. *Lancet*. 2023; 401(10379):795. [https://doi.org/10.1016/S0140-6736\(23\)00493-2](https://doi.org/10.1016/S0140-6736(23)00493-2) PMID: 36906338
6. Logue JK, Franko NM, McCulloch DJ, McDonald D, Magedson A, Wolf CR, et al. Sequelae in Adults at 6 Months After COVID-19 Infection. *JAMA Network Open*. 2021; 4(2):e210830–e.
7. Perlis RH, Trujillo KL, Safarpour A, Santillana M, Ognyanova K, Druckman J, et al. Association of post-COVID-19 condition symptoms and employment status. *JAMA network open*. 2023; 6(2):e2256152–e. <https://doi.org/10.1001/jamanetworkopen.2022.56152> PMID: 36790806
8. Koumpias AM, Schwartzman D, Fleming O. Long-haul COVID: healthcare utilization and medical expenditures 6 months post-diagnosis. *BMC Health Services Research*. 2022; 22(1):1010.
9. Iwashyna TJ, Kamphuis LA, Gundel SJ, Hope AA, Jolley S, Admon AJ, et al. Continuing cardiopulmonary symptoms, disability, and financial toxicity 1 month after hospitalization for third-wave COVID-19: early results from a US nationwide cohort. *Journal of hospital medicine*. 2021; 16(9):531–7. <https://doi.org/10.12788/jhm.3660> PMID: 34424190



10. Chua K-P, Conti RM, Becker NV. Out-of-pocket spending for health care after COVID-19 hospitalization. *The American journal of managed care*. 2022; 28(8):398. <https://doi.org/10.37765/ajmc.2022.88852> PMID: 35981125
11. Bowe B, Xie Y, Al-Aly Z. Postacute sequelae of COVID-19 at 2 years. *Nature Medicine*. 2023. <https://doi.org/10.1038/s41591-023-02521-2> PMID: 37605079
12. Huang BZ, Creekmur B, Yoo MS, Broder B, Subject C, Sharp AL. Healthcare Utilization Among Patients Diagnosed with COVID-19 in a Large Integrated Health System. *Journal of General Internal Medicine*. 2022; 37(4):830–7. <https://doi.org/10.1007/s11606-021-07139-z> PMID: 34993879
13. Koumpias AM, Schwartzman D, Fleming O. Long-haul COVID: healthcare utilization and medical expenditures 6 months post-diagnosis. *BMC Health Serv Res*. 2022; 22(1):1010.
14. Tene L, Bergroth T, Eisenberg A, David SSB, Chodick G. Risk factors, health outcomes, healthcare services utilization, and direct medical costs of patients with long COVID. *International Journal of Infectious Diseases*. 2023; 128:3–10. <https://doi.org/10.1016/j.ijid.2022.12.002> PMID: 36529373
15. Katz GM, Bach K, Bobos P, Cheung A, Décary S, Goulding S, et al. Understanding How Post-COVID-19 Condition Affects Adults and Health Care Systems. *JAMA Health Forum*. 2023; 4(7):e231933. <https://doi.org/10.1001/jamahealthforum.2023.1933> PMID: 37418268
16. Hair NL, Urban C. Association of Severe COVID-19 and Persistent COVID-19 Symptoms With Economic Hardship Among US Families. *JAMA Network Open*. 2023; 6(12):e2347318–e. <https://doi.org/10.1001/jamanetworkopen.2023.47318> PMID: 38085541
17. EVALUATION TIFHMA. Global Burden of Disease (GBD) 2019 [Available from: <https://www.healthdata.org/research-analysis/gbd>.
18. Cutler DM. The Costs of Long COVID. *JAMA Health Forum*. 2022;3(5):e221809-e. <https://doi.org/10.1001/jamahealthforum.2022.1809> PMID: 36219031
19. Pisu M, Martin MY. Financial toxicity: a common problem affecting patient care and health. *Nature Reviews Disease Primers*. 2022; 8(1):7. <https://doi.org/10.1038/s41572-022-00341-1> PMID: 35145106
20. Pike J, Kompaniyets L, Lindley MC, Saydah S, Miller G. Direct Medical Costs Associated With Post-COVID-19 Conditions Among Privately Insured Children and Adults. *Prev Chronic Dis*. 2023; 20:E06. <https://doi.org/10.5888/pcd20.220292> PMID: 36757854
21. Womer J, Sarma N, Hauschildt K, Caldwell E, Admon A, Hough C, et al. Financial Toxicity Is Associated With Impaired Recovery After Severe COVID-19: Results From the BLUE-CORAL Study. B21 SUPPORTING PATIENTS AND FAMILIES THROUGH SERIOUS ILLNESS AND RECOVERY: American Thoracic Society; 2023. p. A2829-A.
22. Datta BK, Coughlin SS, Fazlul I, Pandey A. COVID-19 and health care–related financial toxicity in the United States: Evidence from the 2022 National Health Interview Survey. *American Journal of Infection Control*. 2024; 52(4):392–9.
23. Ruengorn C, Awiphan R, Wongpakaran N, Wongpakaran T, Nochaiwong S, Outcomes H, et al. Association of job loss, income loss, and financial burden with adverse mental health outcomes during coronavirus disease 2019 pandemic in Thailand: A nationwide cross-sectional study. *Depression and Anxiety*. 2021; 38(6):648–60. <https://doi.org/10.1002/da.23155> PMID: 33793028
24. Thomas R, Jacob QM, Raj Eliza S, Mini M, Jose J. Financial burden and catastrophic health expenditure associated with COVID-19 hospitalizations in kerala, south India. *ClinicoEconomics and Outcomes Research*. 2022:439–46. <https://doi.org/10.2147/CEOR.S365999> PMID: 35813122
25. Faramarzi A, Norouzi S, Dehdarirad H, Aghlmand S, Yusefzadeh H, Javan-Noughabi J. The global economic burden of COVID-19 disease: a comprehensive systematic review and meta-analysis. *Systematic Reviews*. 2024; 13(1):68. <https://doi.org/10.1186/s13643-024-02476-6> PMID: 38365735
26. Statistics NCFH. National Health Interview Survey, 2022. Public-use data file and documentation. 2023 [Available from: <https://www.cdc.gov/nchs/nhis/2022nhis.htm>
27. Statistics NCFH. National Health Interview Survey, 2022 survey description. 2023 [Available from: [https://ftp.cdc.gov/pub/Health\\_Statistics/NCHS/Dataset\\_Documentation/NHIS/2022/srvydesc-508.pdf](https://ftp.cdc.gov/pub/Health_Statistics/NCHS/Dataset_Documentation/NHIS/2022/srvydesc-508.pdf)
28. Statistics NCFH. Preferred Reporting Items for Complex Sample Survey Analysis (PRICSSA) 2022 National Health Interview Survey 2023 [Available from: [https://ftp.cdc.gov/pub/Health\\_Statistics/NCHS/Dataset\\_Documentation/NHIS/2022/2022-NHIS-PRICSSA-508.pdf](https://ftp.cdc.gov/pub/Health_Statistics/NCHS/Dataset_Documentation/NHIS/2022/2022-NHIS-PRICSSA-508.pdf).
29. Organization WH. Post COVID-19 condition (Long COVID) 2022 [cited 2023 December 19]. Available from: <https://www.who.int/europe/news-room/fact-sheets/item/post-covid-19-condition>.
30. Lederer DJ, Bell SC, Branson RD, Chalmers JD, Marshall R, Maslove DM, et al. Control of Confounding and Reporting of Results in Causal Inference Studies. *Guidance for Authors from Editors of Respiratory, Sleep, and Critical Care Journals*. *Ann Am Thorac Soc*. 2019; 16(1):22–8.
31. Statistics NCFH. NCHS Urban-Rural Classification Scheme for Counties. 2013.

32. Bickel G, Nord M, Price C, Hamilton W, Cook J. Guide to measuring household food security, revised 2000. 2000.
33. Valero-Elizondo J, Chouairi F, Khera R, Grandhi GR, Saxena A, Warraich HJ, et al. Atherosclerotic Cardiovascular Disease, Cancer, and Financial Toxicity Among Adults in the United States. *JACC CardioOncol*. 2021; 3(2):236–46.
34. Palmer M, Harley D. Models and measurement in disability: an international review. *Health Policy and Planning*. 2012; 27(5):357–64. <https://doi.org/10.1093/heapol/czr047> PMID: 21729911
35. United Nations Statistics Division Washington Group on Disability Statistics Homepage. [Available from: <https://unstats.un.org/unsd/methods/citygroup/washington.htm>.
36. Chan KT, Algood C, Prifti A, Zidan T. Cross-Cultural Measurement Invariance of a Measure of Disability for White, Black, Hispanic and Asian Older Adults. *Int J Environ Res Public Health*. 2021; 18(4). <https://doi.org/10.3390/ijerph18041401> PMID: 33546272
37. Statistics WGoD. An introduction to the Washington Group on Disability Statistics question sets. [Available from: <https://www.washingtongroupdisability.com/fileadmin/uploads/wg/Documents/Primer.pdf>.
38. Rutter LA, Brown TA. Psychometric properties of the generalized anxiety disorder scale-7 (GAD-7) in outpatients with anxiety and mood disorders. *Journal of psychopathology and behavioral assessment*. 2017; 39:140–6. <https://doi.org/10.1007/s10862-016-9571-9> PMID: 28260835
39. Thorndike RM. Book review: psychometric theory by Jum Nunnally and Ira Bernstein New York: McGraw-hill, 1994, xxiv+ 752 pp. *Applied psychological measurement*. 1995; 19(3):303–5.
40. Kroenke K, Strine TW, Spitzer RL, Williams JB, Berry JT, Mokdad AH. The PHQ-8 as a measure of current depression in the general population. *Journal of affective disorders*. 2009; 114(1–3):163–73. <https://doi.org/10.1016/j.jad.2008.06.026> PMID: 18752852
41. Pressler SJ, Subramanian U, Perkins SM, Gradus-Pizlo I, Kareken D, Kim J, et al. Measuring depressive symptoms in heart failure: validity and reliability of the patient health questionnaire-8. *Am J Crit Care*. 2011; 20(2):146–52. <https://doi.org/10.4037/ajcc2010931> PMID: 20378777
42. Chen JE, Lou VW, Jian H, Zhou Z, Yan M, Zhu J, et al. Objective and subjective financial burden and its associations with health-related quality of life among lung cancer patients. *Supportive Care in Cancer*. 2018; 26(4):1265–72. <https://doi.org/10.1007/s00520-017-3949-4> PMID: 29105024
43. Nguyen NH, Khera R, Ohno-Machado L, Sandborn WJ, Singh S. Prevalence and effects of food insecurity and social support on financial toxicity in and healthcare use by patients with inflammatory bowel diseases. *Clinical Gastroenterology and Hepatology*. 2021; 19(7):1377–86. e5. <https://doi.org/10.1016/j.cgh.2020.05.056> PMID: 32526341
44. Taylor KK, Neiman PU, Liu C, Sheetz K, Sinco B, Scott JW. Financial Toxicity Among Surgical Patients Varies by Income and Insurance: A Cross-sectional Analysis of the National Health Interview Survey. *Ann Surg*. 2022; 276(1):e56–e8. <https://doi.org/10.1097/SLA.0000000000005382> PMID: 35129477
45. Si Y, Lee S, Heeringa SG. Population Weighting in Statistical Analysis. *JAMA Internal Medicine*. 2023.
46. Tsampasian V, Elghazaly H, Chattopadhyay R, Debski M, Naing TKP, Garg P, et al. Risk factors associated with Post- COVID-19 condition: a systematic review and meta-analysis. *JAMA Internal Medicine*. 2023. <https://doi.org/10.1001/jamainternmed.2023.0750> PMID: 36951832
47. Harry C, Sanara R, Joseph N, Megan Y, Paul E. Long covid—mechanisms, risk factors, and management. *BMJ*. 2021; 374:n1648. <https://doi.org/10.1136/bmj.n1648> PMID: 34312178
48. Xie Y, Xu E, Bowe B, Al-Aly Z. Long-term cardiovascular outcomes of COVID-19. *Nat Med*. 2022; 28(3):583–90. <https://doi.org/10.1038/s41591-022-01689-3> PMID: 35132265
49. Xie Y, Al-Aly Z. Risks and burdens of incident diabetes in long COVID: a cohort study. *Lancet Diabetes Endocrinol*. 2022; 10(5):311–21. [https://doi.org/10.1016/S2213-8587\(22\)00044-4](https://doi.org/10.1016/S2213-8587(22)00044-4) PMID: 35325624
50. Kim S, Lee H, Lee J, Lee SW, Kwon R, Kim MS, et al. Short- and long-term neuropsychiatric outcomes in long COVID in South Korea and Japan. *Nat Hum Behav*. 2024. <https://doi.org/10.1038/s41562-024-01895-8> PMID: 38918517
51. Choi Y, Kim HJ, Park J, Lee M, Kim S, Koyanagi A, et al. Acute and post-acute respiratory complications of SARS-CoV-2 infection: population-based cohort study in South Korea and Japan. *Nat Commun*. 2024; 15(1):4499. <https://doi.org/10.1038/s41467-024-48825-w> PMID: 38802352
52. Gualano MR, Rossi MF, Borrelli I, Santoro PE, Amantea C, Daniele A, et al. Returning to work and the impact of post COVID-19 condition: A systematic review. *Work*. 2022; 73(2):405–13. <https://doi.org/10.3233/WOR-220103> PMID: 35938280
53. Zaidan M, Puebla Neira D, Polychronopoulou E, Yong-Fang K, Sharma G. Healthcare utilization 9 months pre- and post- COVID-19 hospitalization among patients discharged alive. *PLoS One*. 2024; 19(6):e0303509. <https://doi.org/10.1371/journal.pone.0303509> PMID: 38900737

54. Khara R, Valero-Elizondo J, Nasir K. Financial Toxicity in Atherosclerotic Cardiovascular Disease in the United States: Current State and Future Directions. *J Am Heart Assoc*. 2020; 9(19):e017793. <https://doi.org/10.1161/JAHA.120.017793> PMID: 32924728
55. Patel MR, Jagsi R, Resnicow K, Smith SN, Hamel LM, Su C, et al. A Scoping Review of Behavioral Interventions Addressing Medical Financial Hardship. *Popul Health Manag*. 2021; 24(6):710–21. <https://doi.org/10.1089/pop.2021.0043> PMID: 33989065
56. Zafar SY. Financial Toxicity of Cancer Care: It's Time to Intervene. *J Natl Cancer Inst*. 2016; 108(5). <https://doi.org/10.1093/jnci/djv370> PMID: 26657334
57. Graves JA, Baig K, Buntin M. The Financial Effects and Consequences of COVID-19: A Gathering Storm. *JAMA*. 2021; 326(19):1909–10. <https://doi.org/10.1001/jama.2021.18863> PMID: 34714325
58. King JS. Covid-19 and the Need for Health Care Reform. *N Engl J Med*. 2020; 382(26):e104. <https://doi.org/10.1056/NEJMp2000821> PMID: 32302074
59. Michelen M, Manoharan L, Elkheir N, Cheng V, Dagens A, Hastie C, et al. Characterising long COVID: a living systematic review. *BMJ Glob Health*. 2021; 6(9). <https://doi.org/10.1136/bmjgh-2021-005427> PMID: 34580069
60. King JS. Covid-19 and the need for health care reform. *New England Journal of Medicine*. 2020; 382(26):e104. <https://doi.org/10.1056/NEJMp2000821> PMID: 32302074
61. Blumberg SJ, Parker JD, Moyer BC. National Health Interview Survey, COVID-19, and Online Data Collection Platforms: Adaptations, Tradeoffs, and New Directions. *Am J Public Health*. 2021; 111(12):2167–75. <https://doi.org/10.2105/AJPH.2021.306516> PMID: 34878857
62. Bramlett DJ MD, Bose J, Blumberg SJ. New procedures for nonresponse adjustments to the 2019 National Health Interview Survey sampling weights.: National Center for Health Statistics; 2020 [Available from: [https://ftp.cdc.gov/pub/Health\\_Statistics/NCHS/Dataset\\_Documentation/NHIS/2019/nonresponse-report-508.pdf](https://ftp.cdc.gov/pub/Health_Statistics/NCHS/Dataset_Documentation/NHIS/2019/nonresponse-report-508.pdf).
63. Fernandez-de-Las-Peñas C, Notarte KI, Macasaet R, Velasco JV, Catahay JA, Ver AT, et al. Persistence of post-COVID symptoms in the general population two years after SARS-CoV-2 infection: A systematic review and meta-analysis. *J Infect*. 2024; 88(2):77–88. <https://doi.org/10.1016/j.jinf.2023.12.004> PMID: 38101521
64. Notarte KI, Catahay JA, Velasco JV, Pastrana A, Ver AT, Pangilinan FC, et al. Impact of COVID-19 vaccination on the risk of developing long-COVID and on existing long-COVID symptoms: A systematic review. *EClinicalMedicine*. 2022; 53:101624. <https://doi.org/10.1016/j.eclinm.2022.101624> PMID: 36051247
65. Fernández-de-Las-Peñas C, Torres-Macho J, Catahay JA, Macasaet R, Velasco JV, Macapagal S, et al. Is antiviral treatment at the acute phase of COVID-19 effective for decreasing the risk of long-COVID? A systematic review. *Infection*. 2024; 52(1):43–58. <https://doi.org/10.1007/s15010-023-02154-0> PMID: 38113020
